# Supplementary material
Source: PubMed Central journal article supplement (PMC4242514)

**Supplementary Material****BANDS-BULK****BANDS S-Mo-S****PDOS**

The biggest contribution for the majority spin comes from the  $3p$  orbitals of the S atoms, followed by the  $4d$  orbitals of Mo. For the minority spin, the states just above the Fermi energy are mainly from the  $4d$  orbitals of the Mo and the  $3d$  orbitals of S atoms. As we cross the Fermi energy, the minority spin DOS goes to 0, and below that, the relative weights invert for the group of bands shown in Fig. 5, where the contribution of the  $3p$  orbitals from the S atoms contributes more than the  $4d$  orbitals of the Mo atoms

Peer Review

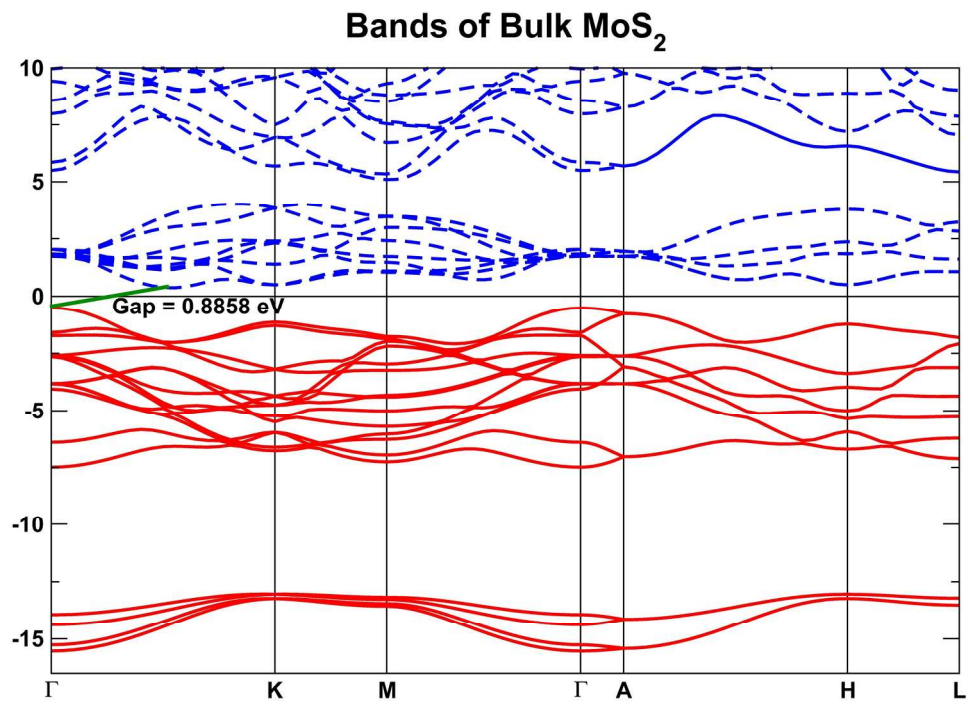

196x144mm (300 x 300 DPI)

Review

1  
2  
3  
4  
5  
6  
7  
8  
9  
10  
11  
12  
13  
14  
15  
16  
17  
18  
19  
20  
21  
22  
23  
24  
25  
26  
27  
28  
29  
30  
31  
32  
33  
34  
35  
36  
37  
38  
39  
40  
41  
42  
43  
44  
45  
46  
47  
48  
49  
50  
51  
52  
53  
54  
55  
56  
57  
58  
59  
60

## Bands of MoS<sub>2</sub> Monolayer

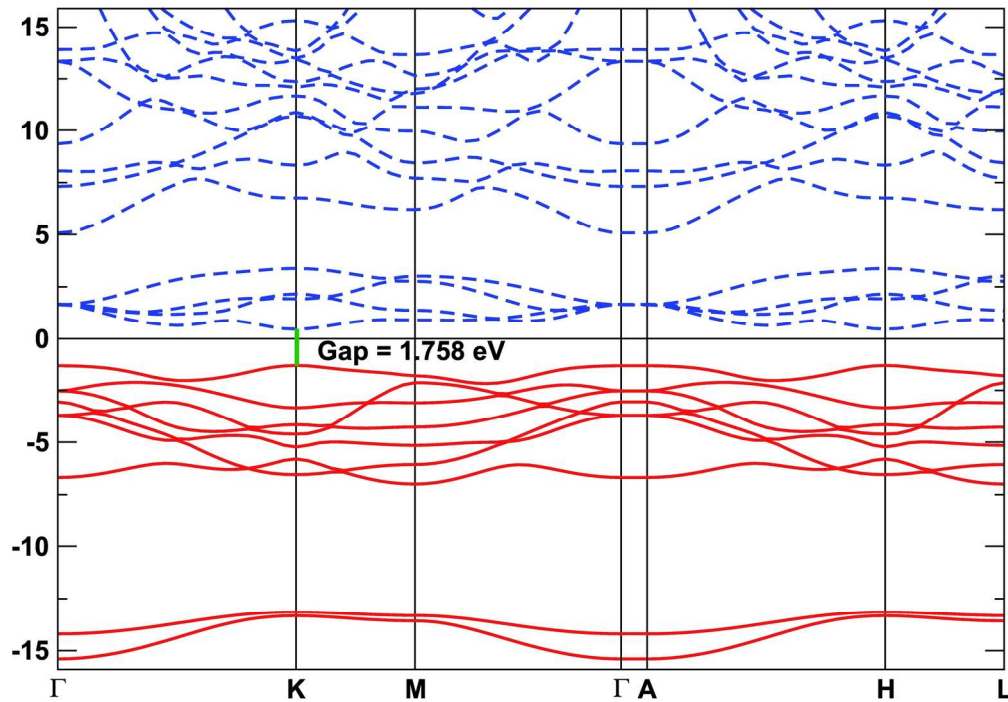

176x136mm (300 x 300 DPI)

review

1  
2  
3  
4  
5  
6  
7  
8  
9  
10  
11  
12  
13  
14  
15  
16  
17  
18  
19  
20  
21  
22  
23  
24  
25  
26  
27  
28  
29  
30  
31  
32  
33  
34  
35  
36  
37  
38  
39  
40  
41  
42  
43  
44  
45  
46  
47  
48  
49  
50  
51  
52  
53  
54  
55  
56  
57  
58  
59  
60

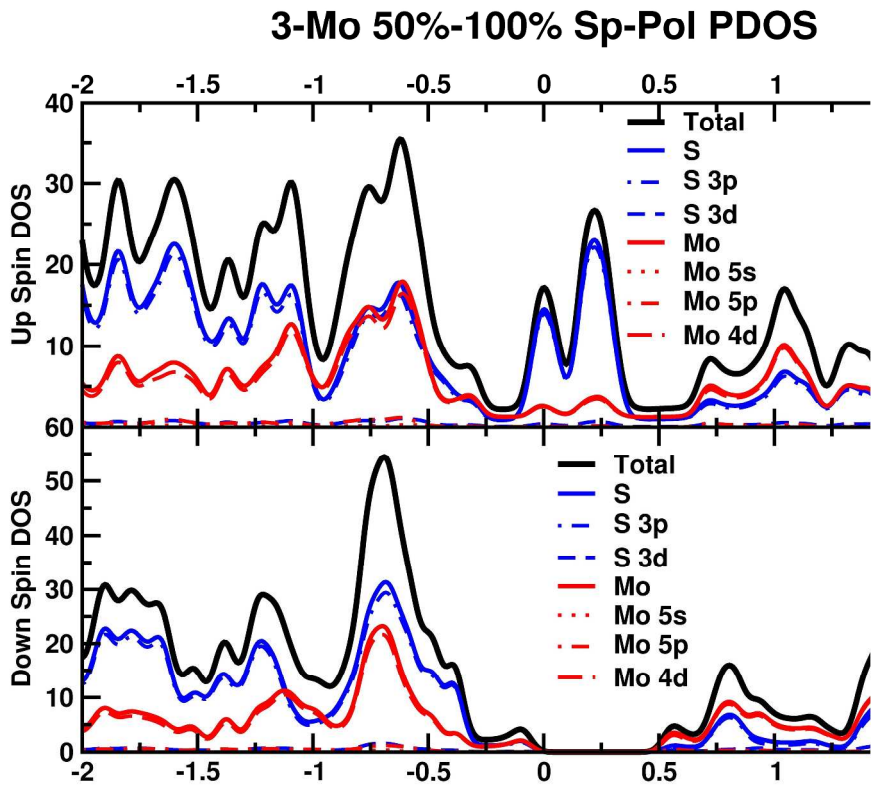

279x361mm (300 x 300 DPI)

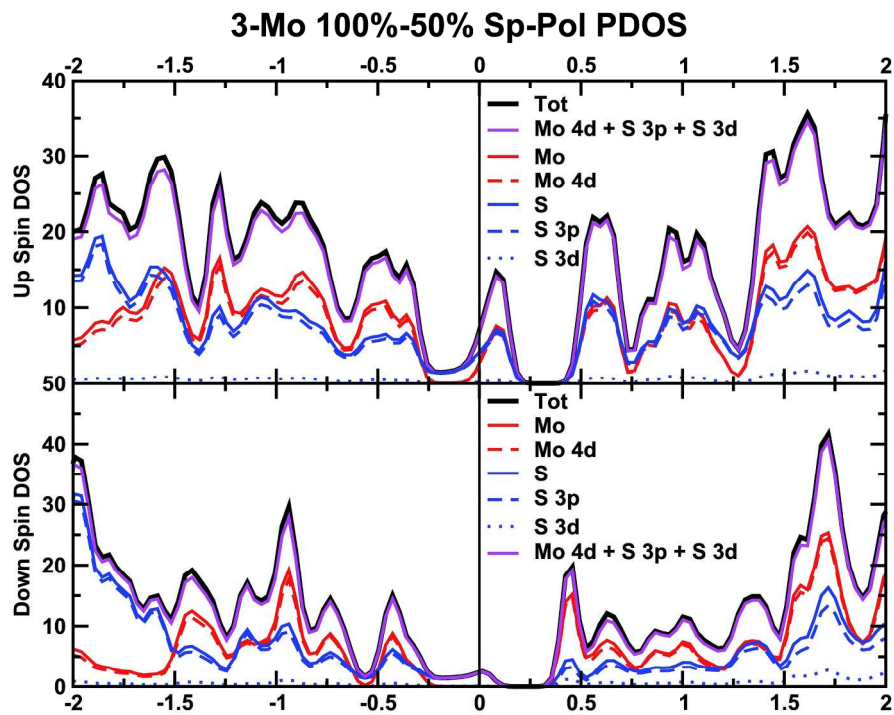

215x166mm (300 x 300 DPI)

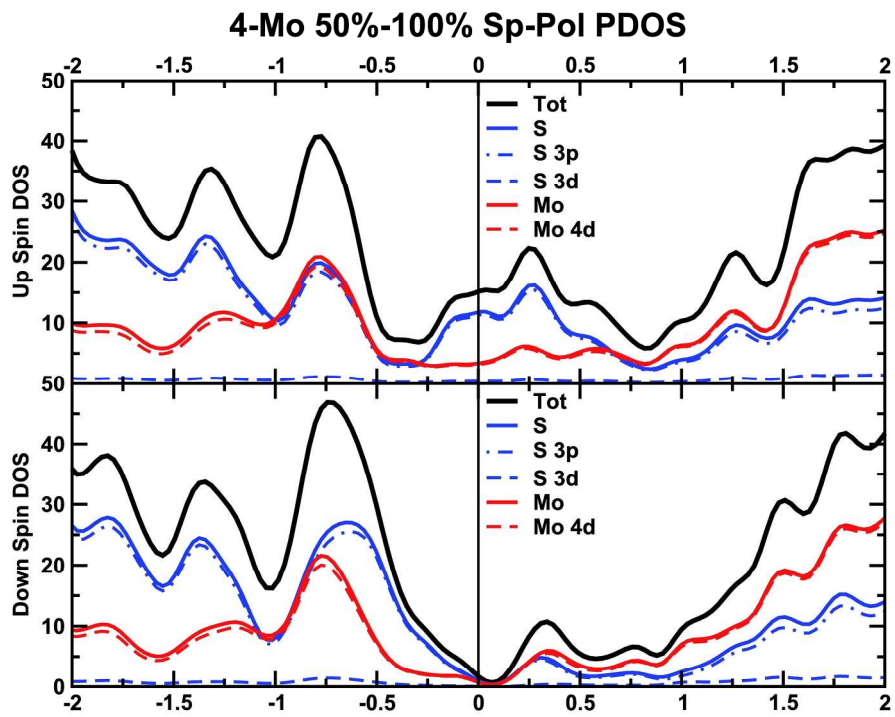

215x166mm (300 x 300 DPI)

review

1  
2  
3  
4  
5  
6  
7  
8  
9  
10  
11  
12  
13  
14  
15  
16  
17  
18  
19  
20  
21  
22  
23  
24  
25  
26  
27  
28  
29  
30  
31  
32  
33  
34  
35  
36  
37  
38  
39  
40  
41  
42  
43  
44  
45  
46  
47  
48  
49  
50  
51  
52  
53  
54  
55  
56  
57  
58  
59  
60

Type of file: figure

Label: Suppl1

Filename: S088429141200355Xsup001.eps





Type of file: figure

Label: Suppl2

Filename: S088429141200355Xsup002.eps



Type of file: figure

Label: Suppl3

Filename: S088429141200355Xsup003.tiff

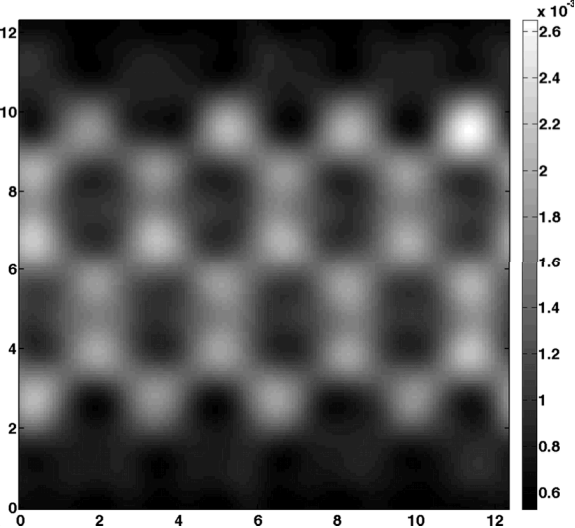

Type of file: figure

Label: Suppl4

Filename: S088429141200355Xsup004.tiff

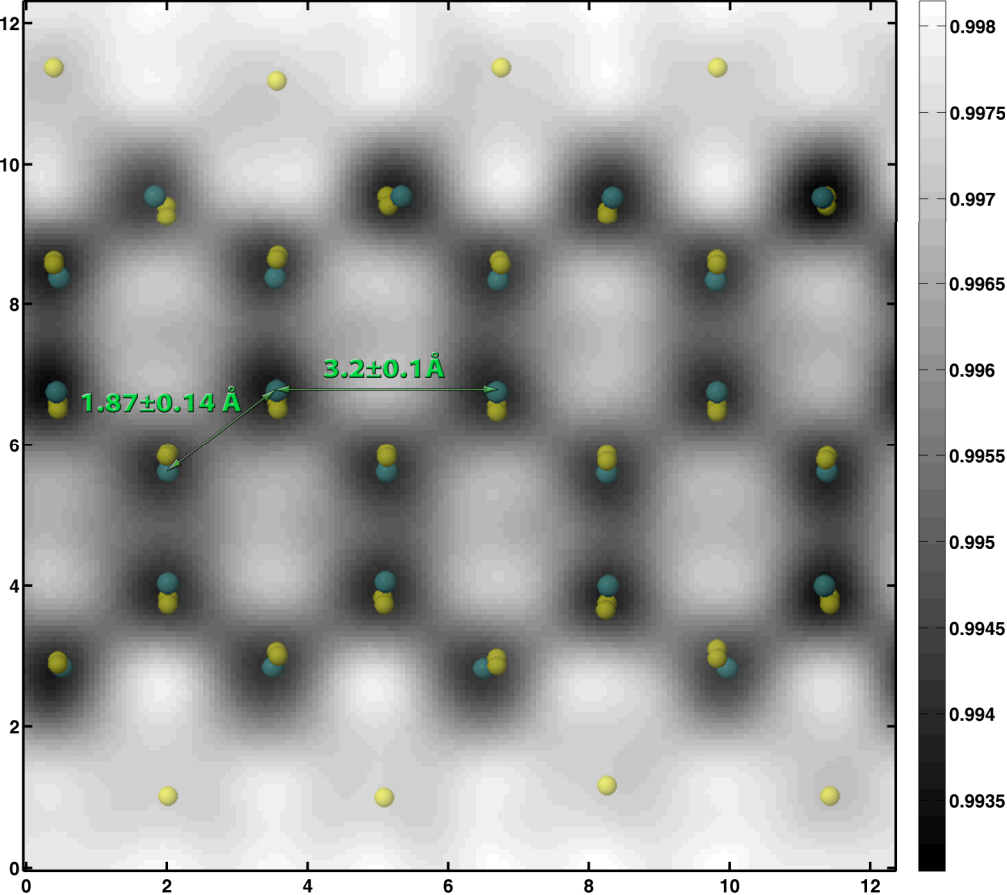

Supplement: NIHMS439339-supplement-01.pdf [file NIHMS439339-supplement-01.pdf]
